# Supplementary material for: Density functional study of fluorescent indicators for the intracellular determination of Ca2+ and Mg2+†
Source: Royal Society of Chemistry journal article supplement (doi:10.1039/b007538h), 2001-01-01
Supplement: b007538h.doc [file b007538h.doc]

**Supplementary data**

Density functional study of fluorescent indicators for the intracellular determination of Ca2+ and Mg2+:

Supplementary material

# **Annelies Delabiea*, Els Cielenb, Noël Boensb and Kristine Pierloota**

a Quantum Chemistry Group, Department of Chemistry, University of Leuven, Celestijnenlaan 200 F, B-3001 Heverlee-Leuven, Belgium. *e-mail: annelies.delabie@chem.kuleuven.ac.be

b Photochemistry and Spectroscopy, Department of Chemistry, University of Leuven, Celestijnenlaan 200 F, B-3001 Heverlee-Leuven, Belgium

Structural parameters of the IH2- systems with different substituents (R = CN, H and OCH3) and different protonation sites (CO2OH or CO3OH).

|  | IH2-  (with CO2OH group) | | | IH2-  (with CO3OH group) | | | |
| --- | --- | --- | --- | --- | --- | --- | --- |
| R= | CN | H | OCH3 | | CN | H | OCH3 |
|  C-N-C (°) | 359.2 | 358.1 | 357.9 | | 359.0 | 358.6 | 358.9 |
| T1 (°) | -0.5 | -0.4 | -2.1 | | 0.4 | 0.5 | 0.9 |
| T2 (°) | 2.0 | 3.3 | 4.5 | | -1.3 | -1.5 | -1.2 |
| T3 (°) | 165.6 | 171.1 | 166.2 | | 188.1 | 189.3 | 189.5 |
| T4 (°) | -24.8 | -25.0 | -30.3 | | -3.7 | -5.1 | -3.1 |
| T5 (°) | 96.2 | 95.1 | 101.4 | | 45.6 | 45.7 | 45.5 |
